# Supplementary material
Source: HighWire-hosted journal article supplement (https://www.ez-admanager.com/content/suppl/2018/06/28/WNL.0000000000004741)
Supplement: mcgrath2447.pdf [file mcgrath2447.pdf]

# Presión arterial desde la mediana edad hasta la edad avanzada y riesgo de demencia incidental

Emer R. McGrath, MB,  
PhD  
Alexa S. Beiser, PhD  
Charles DeCarli, MD  
Kendra L. Plourde, MA  
Ramachandran S. Vasan,  
MD  
Steven M. Greenberg,  
MD, PhD  
Sudha Seshadri, MD

Correspondencia y solicitud de  
separatas al Dr. McGrath:  
emcgrath2@partners.org

## RESUMEN

**Objetivo:** Determinar la asociación entre la presión arterial durante la mediana edad (40-64 años) hasta edad avanzada ( $\geq 65$  años) y el riesgo de demencia incidental.

**Métodos:** Este estudio incluyó 1440 (758 mujeres, edad media  $69 \pm 6$  años) participantes del Framingham Offspring, que no tenían demencia y realizaron 5 exámenes consecutivos a intervalos de 4 años comenzando a mediana edad (1983-1987, edad media 55 años) hasta edad avanzada (1998-2001, edad media 69 años), y subsecuentemente fueron seguidos para identificar demencia incidental (media 8 años). Determinamos el efecto de la hipertensión ( $\geq 140/90$  mm Hg) en la mediana edad, en edad avanzada, menor presión arterial ( $< 100/70$  mm Hg) en edad avanzada, persistencia de hipertensión durante la mediana edad y edad avanzada, y reducción abrupta de la presión arterial desde la mediana edad hasta edad avanzada durante un período de 18 años de exposición.

**Resultados:** Durante el período de seguimiento, 107 participantes (71 mujeres) desarrollaron demencia. Utilizando modelos Cox multivariantes de riesgos proporcionales, encontramos que la hipertensión sistólica en la mediana edad (razón de riesgo [HR, *hazard ratio*]) 1,57, intervalo de confianza [IC] 95% 1,05-2,35) y la persistencia de la hipertensión sistólica hacia la edad avanzada (HR 1,96, IC 95% 1,25-3,09) estuvieron asociadas con un riesgo elevado de demencia incidental. Sin embargo, en individuos con presión arterial normal a baja ( $\leq 140/90$  mm Hg) en la mediana edad, una reducción abrupta de la presión arterial sistólica desde la mediana edad hacia la edad avanzada también estuvo asociado con un aumento  $> 2$  veces el riesgo de demencia (HR 2,40, IC 95% 1,39-4,15).

**Conclusiones:** La presión arterial elevada durante la mediana edad, la persistencia de la presión arterial elevada hacia la edad avanzada y, entre los no hipertensos, la reducción abrupta de la presión arterial desde la mediana edad hacia la edad avanzada, estuvieron asociados con un riesgo aumentado de demencia en una cohorte de la comunidad. Nuestros datos resaltan los beneficios cognitivos sustanciales potenciales de la presión arterial baja en la mediana edad, pero también sugieren que la reducción de la presión arterial en adultos mayores con prehipertensión o normotensión, pero no en aquellos con hipertensión, puede ser un riesgo de demencia. *Neurology*® 2017;89:2447-2454

## GLOSARIO

**ABC** = área bajo la curva; **DSM-IV** = *Diagnostic and Statistical Manual of Mental Disorders, 4th edition* (Manual Diagnóstico y Estadístico de Enfermedades Mentales, 4ta edición); **EA** = enfermedad de Alzheimer; **HR** = *hazard ratio* (razón de riesgo); **IC** = intervalo de confianza; **ICE** = infarto cerebral encubierto; **JNC-7** = *Joint National Committee on Prevention, Detection, Evaluation, and Treatment of High Blood Pressure 7* (Comité Nacional Conjunto de Prevención, Detección, Evaluación y Tratamiento de la Presión Arterial Elevada 7); **PA** = presión arterial; **PAD** = presión arterial diastólica; **PAS** = presión arterial sistólica; **PROGRESS** = *Perindopril Protection Against Recurrent Stroke Study* (Estudio de Protección del Perindopril Contra el Infarto Cerebral Recurrente); **Syst-Eur** = Hipertensión Sistólica en Europa; **VCT** = volumen cerebral total; **VH** = volumen hipocampal; **VHSB** = volumen de hipertintensidad de sustancia blanca.

La demencia es un problema significativo de salud con una prevalencia estimada de 35 millones alrededor del mundo.<sup>1</sup> Se espera que el número de casos de demencia se triplique alrededor del mundo para 2050, como resultado de una población envejecida y la falta de terapias efectivas que modifiquen la enfermedad.<sup>1</sup> Enfocándonos en la prevención de la demencia, es por lo tanto crucial atacar este problema creciente. La hipertensión es un factor de riesgo modificable clave para la patología cerebrovascular que lleva al infarto cerebral y a la demencia. La hipertensión tanto en la mediana edad (40-64 años) como en la edad avanzada ( $\geq 65$  años) ha sido asociada con un aumento en el riesgo de un pobre desempeño cognitivo y deterioro cognitivo.<sup>2,3</sup> Sin embargo, la naturaleza precisa de la relación entre la hipertensión en la mediana edad y en la edad avanzada y la demencia clínicamente confirmada, no se comprende del todo. Estudios longitudinales previos han reportado hallazgos conflictivos,<sup>4-12</sup> y algunos han sido limitados por el uso de una histo-

Datos suplementarios en  
[Neurology.org](http://Neurology.org)

Del Department of Neurology (E.R.M.), Brigham & Women's Hospital; Department of Neurology (E.R.M., S.M.G.), Massachusetts General Hospital; Harvard Medical School (E.R.M., S.M.G.); Boston University School of Medicine (A.S.B., R.S.V., S.S.); Boston University School of Public Health (A.S.B., K.L.P., R.S.V.); Framingham Heart Study (A.S.B., R.S.V., S.S.), MA; y <sup>7</sup>Department of Neurology (C.D.), University of California, Davis.

Ir a [Neurology.org](http://Neurology.org) para declaraciones de intereses completas. La información sobre fondos y aquellas declaraciones relevantes para los autores, si existiesen, se encuentran al final del artículo.

ria de hipertensión auto-relatada y no por registros objetivos de presión arterial (PA), el uso de una medición única y no de mediciones repetidas de PA, muestras de tamaño pequeño con una tasa baja de eventos finales, una duración corta del seguimiento y el uso de resultados de demencia sobre la base de registros médicos que son menos confiables que un diagnóstico validado por un investigador.

Más aún, la relación entre la trayectoria de la PA entre la mediana edad y la edad avanzada y el riesgo de demencia no se entiende bien. Estudios previos no incluyeron medidas de PA a lo largo del período de vida desde la mediana edad en adelante y excluyeron a las mujeres.<sup>13</sup> Una gran reducción en la PA sistólica (PAS) ha sido asociada con un aumento en el riesgo de demencia y enfermedad de Alzheimer (EA), si ocurre entre los 3 a 6 años que preceden la demencia.<sup>14</sup> Sin embargo, la causalidad invertida puede justificar dicha asociación. No se sabe si una gran reducción en la PA durante un largo período, por ej., desde la mediana edad hasta la edad avanzada, está asociada a un incremento en el riesgo de demencia luego de realizar un ajuste para los otros factores de riesgo. Una mejor comprensión de la asociación entre la PA durante las edades mediana y avanzada, y su subsecuente riesgo de demencia, ayudaría a tener intervenciones dirigidas a mitigar el riesgo de demencia en el final de la vida. En esta investigación, evaluamos la asociación de la PA en la mediana edad, edad avanzada y tendencias en la PA desde la mediana edad hasta la edad avanzada, con el subsecuente riesgo de demencia de cualquier causa y EA en una cohorte grande de la comunidad.

**MÉTODOS** **Muestra del estudio.** El estudio *Framingham Offspring* (reclutamiento 1971–1975) es una gran cohorte de la comunidad de mediana edad que ha sido seguida longitudinalmente para factores de riesgo cardiovasculares y la ocurrencia de infarto cerebral, deterioro cognitivo y demencia por > 40 años.<sup>15</sup> Los participantes son examinados aproximadamente cada 4 años desde la fecha de entrada a la cohorte. Los participantes de la cohorte *Offspring* que asistieron a un mínimo de 5 exámenes secuenciales comenzando en la mediana edad (examen 3 [1983–1987], edad media 55 años) y continuaron hacia la edad avanzada (examen 7 [1998–2001], edad media 69 años) que eran  $\geq 60$  años y sin diagnóstico de demencia (con base en el monitoreo realizado) al momento del examen 7 fueron incluidos en este estudio. Las características basales de los participantes excluidos estaban globalmente en línea con aquellos participantes incluidos y se describen en la tabla e-1 en [Neurology.org](http://Neurology.org).

**Aprobaciones estándar de protocolo, registros y consentimiento de pacientes.** Cada participante dio su consentimiento informado por escrito. El comité de revisión institucional del *Boston University Medical Center* aprobó todos los protocolos de estudio y los consentimientos.

**Medidas de resultado.** Nuestra medida de resultado primaria fue la demencia incidental desarrollada en cualquier momento luego de la 7ma visita para examen del *Offspring* y antes de diciembre de 2014. La EA fue una medida de resultado secundaria. Empezando en el examen 5, los participantes eran sistemáticamente estudiados para demencia. Además, en los exámenes de *Offspring* del 7 al 9, a todos los participantes se les daba la oportunidad de completar una batería de pruebas neuropsicológicas de 45 minutos y una RM de cerebro. Si el paciente o un familiar referían cualquier preocupación de compromiso cognitivo, o el médico del estudio Framingham lo sospechaba, o el Examen de Estado Mínimo Mental estaba reducido por debajo de un límite determinado por la educación, estaba reducido por más de 3 puntos respecto al previo, o 5 puntos debajo del puntaje máximo registrado para el participante, se realizaban estudios cognitivos más profundos.<sup>16</sup> A los participantes con sospecha de deterioro cognitivo que no cumplían criterios diagnósticos de demencia, se les realizaba anualmente evaluaciones neuropsicológicas entre los exámenes agendados de *Offspring*. La demencia era diagnosticada de acuerdo con los criterios del DSM-IV, requiriendo un compromiso de la memoria y al menos 1 de los otros dominios cognitivos, junto con una discapacidad funcional documentada.<sup>17</sup> El diagnóstico final y la fecha de diagnóstico de demencia eran establecidos luego de la revisión de todos los registros de exámenes neurológicos disponibles; evaluaciones neuropsicológicas; registro de estudios; registros del hospital, de la enfermería domiciliar y de las clínicas externas; resultados de neuroimágenes; información de entrevistas a familiares y resultados de autopsias (si estaban disponibles); todo revisado por un comité que incluía al menos 1 neurólogo y 1 neuropsicólogo. La EA era diagnosticada cuando los participantes cumplían criterios diagnósticos del *National Institute of Neurologic and Communicative Disorders and Stroke* y el *Alzheimer's Disease and Related Disorders Association* para EA probable o posible.<sup>18</sup> Ver los e-Methods para detalles adicionales.

**Presión arterial.** Se registró la PA de forma estandarizada durante cada ciclo de exámenes y fue calculada como la media de 2 mediciones de PA registradas por un médico mientras el participante se encontraba sentado por un mínimo de 5 minutos con el manguito ajustado a la circunferencia del brazo. Incluimos mediciones de los exámenes del ciclo 3 al 7. La hipertensión sistólica fue definida como una PAS  $\geq 140$  mm Hg y la hipertensión diastólica como una PA diastólica (PAD)  $\geq 90$  mm Hg, en línea con los criterios del *Joint National Committee on Prevention, Detection, Evaluation, and Treatment of High Blood Pressure 7* (JNC-7).<sup>19</sup> La hipertensión de mediana edad fue definida como la presente en el examen 3, y la hipertensión de edad avanzada como la presente en el examen 7. La hipertensión persisten-

te fue definida como una PAS  $\geq 140$  mm Hg y/o PAD  $\geq 90$  mm Hg durante ambos exámenes 3 y 7. La PA baja en la edad avanzada fue definida como una PAS  $< 100$  mm Hg y PAD  $< 70$  mm Hg.

**Covariables.** Realizamos ajustes para covariables demográficas y basales (medidas en el examen 7) asociadas con un mayor riesgo de demencia, incluyendo la edad, el sexo, la educación, la enfermedad cardiovascular y el estado de portación de *APOE4*. Se registró el uso de medicación antihipertensiva y se verificó con las prescripciones y las botellas de pastillas cuando estaban disponibles. Para participantes con una RM de cerebro disponible dentro de los 2 años desde el examen 7 (mediana del tiempo desde el examen 7 a la realización de la RM 0.5 años, rango 0-2 años), también realizamos ajustes para las medidas cerebrales estructurales radiográficas, incluyendo la presencia de infartos cerebrales encubiertos (ICE), volumen cerebral total (VCT), volumen de hiperintensidad de sustancia blanca (VHSB), y volumen hipocampal (VH). Ver e-Methods para más detalles.

**Análisis estadístico.** Estimamos modelos Cox de riesgos proporcionales ajustados para multivariantes para determinar la asociación entre el estado de la PA (hipertensión en mediana edad y edad avanzada [comparada con aquellos sin hipertensión en el punto de tiempo comparable], menor PA en edad avanzada [comparada con aquellos sin PA baja] e hipertensión persistente durante la mediana edad hasta la edad avanzada [comparada con aquellos sin hipertensión persistente]) y el riesgo de demencia y EA. Los pacientes eran censados al momento de su muerte. Postulamos la hipótesis de que una pendiente negativa abrupta de la PAS desde la mediana edad hacia la edad avanzada también estaría asociada con un aumento en el riesgo de demencia. Determinamos la pendiente de la PA para cada individuo a lo largo de los 5 exámenes usando un modelo de regresión

lineal específico para la persona y relacionamos esta pendiente intraindividual con el riesgo de una demencia subsecuente. Se observó un efecto umbral en el primer cuartil de la pendiente de PAS, pendiente de  $< -0,5$  mm Hg/año, por ej., la mayor reducción en la PAS desde la mediana edad a la edad avanzada. Generamos modelos Cox de riesgos proporcionales ajustados para multivariantes para determinar la asociación entre la reducción abrupta en la PAS desde la mediana edad hasta la edad avanzada (pendiente  $< -0,5$  mm Hg/año) comparada con una reducción no abrupta (pendiente  $\geq -0,5$  mm Hg/año) y el riesgo de demencia y EA.

El modelo 1 fue ajustado para edad y sexo; el modelo 2 además se ajustó para educación, historia de enfermedad cardiovascular y estado de portación de *APOE4*; y el modelo 3 además se ajustó para la PA de mediana edad. También evaluamos el efecto de la carga acumulada de PA durante la mediana edad a la edad avanzada (exámenes 3-7) sobre el riesgo de demencia usando el área bajo la curva (ABC). Estimamos la curva promedio de PAS utilizando un modelo lineal con una ranura lineal en edad, nudos en las edades 55, 65 y 75, correspondiendo a las edades medias aproximadas durante los exámenes de seguimiento y para asegurar números suficientes de mediciones de PA en cada uno de los rangos de edad definidos por los nudos. Calculamos las curvas de PAS específicas de cada participante como los mejores predictores lineales no sesgados basados en el modelo y luego calculamos el ABC para el intervalo entre los exámenes 3 y 7. Completamos análisis de regresión lineal no ajustado y ajustado para determinar la asociación del ABC con el riesgo de cualquier demencia y de EA (para cada unidad de DE aumentada en el ABC de la PAS).

Realizamos análisis de subgrupos de acuerdo con el uso/no uso de medicación antihipertensiva en cualquier momento del período de exposición de 18 años, como también un análisis de subgrupo para determinar si el efecto de una reducción abrupta en la PAS desde la mediana edad hasta la

**Figura 1** Flujo de la cohorte de participantes

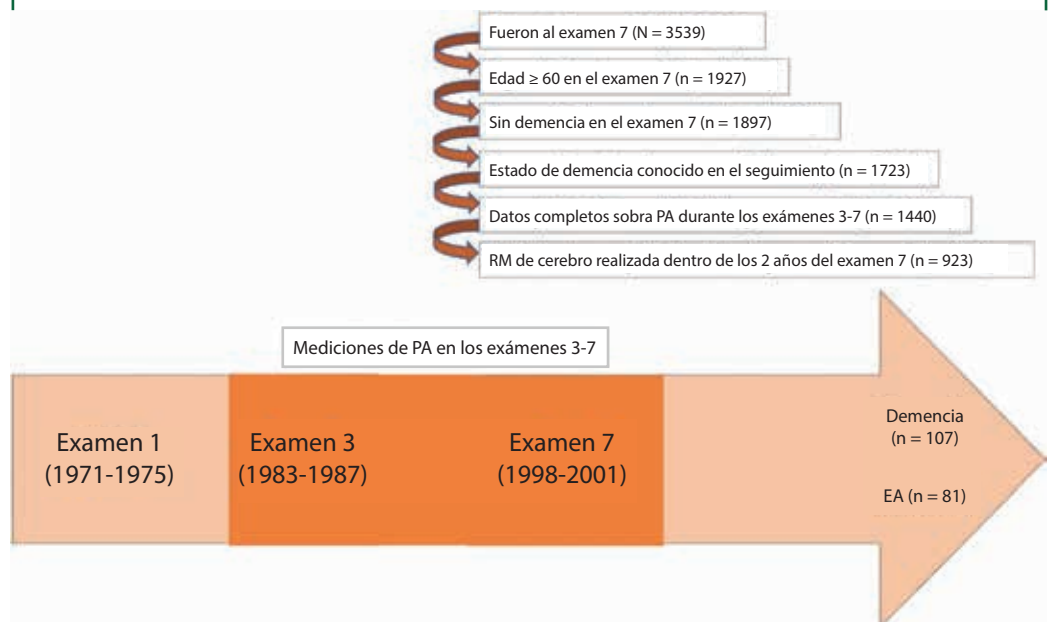

EA = enfermedad de Alzheimer; PA = presión arterial.

**Tabla 1** Características basales y datos de la PA

|                                                                         | Participantes (n = 1440) |
|-------------------------------------------------------------------------|--------------------------|
| Edad, media (DE), años                                                  | 69 (6)                   |
| Hombre, n (%)                                                           | 682/1440 (47)            |
| Educación, n (%)                                                        |                          |
| Secundario incompleto                                                   | 101/1420 (7)             |
| Secundario completo                                                     | 491/1420 (35)            |
| Algunos años de terciario                                               | 414/1420 (29)            |
| Terciario completo                                                      | 414/1420 (29)            |
| Prevalencia ECV, n (%)                                                  | 283/1440 (20)            |
| Alelo APOE ε4, n (%)                                                    | 306/1428 (21)            |
| Diabetes mellitus, n (%)                                                | 232/1405 (17)            |
| Fibrilación auricular, n (%)                                            | 91/1440 (6)              |
| Tabaquismo, n (%)                                                       | 117/1440 (8)             |
| Medicación antihipertensiva, n (%)                                      | 723/1440 (50)            |
| Presión arterial en la mediana edad                                     |                          |
| PAS, media (DE), mm Hg                                                  | 127 (17)                 |
| PAD, media (DE), mm Hg                                                  | 80 (9)                   |
| Hipertensión sistólica, n (%)                                           | 300 (21)                 |
| Hipertensión diastólica, n (%)                                          | 232 (16)                 |
| Cualquier hipertensión, n (%)                                           | 390 (27)                 |
| Presión arterial en edad avanzada                                       |                          |
| PAS, media (DE), mm Hg                                                  | 132 (19)                 |
| PAD, media (DE), mm Hg                                                  | 72 (10)                  |
| Hipertensión sistólica, n (%)                                           | 462 (32)                 |
| Hipertensión diastólica, n (%)                                          | 67 (5)                   |
| Cualquier hipertensión, n (%)                                           | 476 (33)                 |
| Menor presión arterial sistólica, n (%)                                 | 27 (2)                   |
| Menor presión arterial diastólica, n (%)                                | 555 (39)                 |
| Traectoria de la presión arterial de la mediana edad a la edad avanzada |                          |
| Hipertensión sistólica persistente                                      | 166 (12)                 |
| Hipertensión diastólica persistente                                     | 31 (2)                   |
| Reducción abrupta de la PAS                                             | 317 (22)                 |
| Reducción abrupta de la PAD                                             | 748 (52)                 |

Abreviaturas: ECV = enfermedad cardiovascular; PA = presión arterial; PAD = presión arterial diastólica; PAS = presión arterial sistólica.

Las características demográficas y clínicas basales fueron definidas en el examen 7 excepto el uso de la medicación antihipertensiva, que incluyó el uso de antihipertensivos en cualquier momento durante los exámenes 3 y 7.

La hipertensión sistólica fue definida como una PAS  $\geq 140$  mm Hg y la hipertensión diastólica como una PAD  $\geq 90$  mm Hg, en línea con los 7 criterios del *Joint National Committee on Prevention, Detection, Evaluation and Treatment of High Blood Pressure*. Un punto de corte de pendiente  $< -0,5$  indica una reducción abrupta en la presión arterial desde la mediana edad a la edad avanzada. El examen 3 representó la mediana edad (edad media 55 años); el examen 7 representó la edad avanzada (edad media 69 años).

edad avanzada en la demencia incidental variaba de acuerdo con la PA basal en la mediana edad o el uso de terapia antihipertensiva. Completamos los análisis de sensibilidad definiendo hipertensión como PAS/PAD  $\geq 140/90$  mm Hg o el uso de agentes antihipertensivos en el examen 3 (para hipertensión en la mediana edad) o examen 7 (para hipertensión en edad avanzada) para incluir individuos con hipertensión tratada. Finalmente, completamos los análisis adicionales ajustando para las medidas cerebrales estructurales radiográficas, como ICE, VCT, VH y VHSB, en aquellos participantes que habían realizado una RM de cerebro dentro de los 2 años del examen 7 ( $n = 923$ , 64% de la cohorte) para determinar si el ajuste para medidas cerebrales estructurales influenciaba en la asociación de la PA con la demencia

incidental y la EA. Para todos los análisis, se consideró estadísticamente significativo un valor de  $p < 0,05$  o un intervalo de confianza (IC) del 95% que no incluyera 1,0. Los análisis fueron realizados con el *software* estadístico SAS, versión 9.2 (SAS Institute Inc, Cary, NC).

**RESULTADOS** La cohorte del estudio incluyó 1440 participantes. Durante un período de seguimiento medio de 8 (DE 3) años, 107 (7,4%) participantes fueron diagnosticados con demencia, 81 de los cuales tuvieron diagnóstico de EA (figura 1). La edad media de los participantes en el examen 7 fue 69 (DE 6) años, y 53% fueron mujeres (tabla 1). La PA media en la mediana edad fue 127/80 (DE 17/9) mm Hg en la cohorte; 27% de la cohorte alcanzó los criterios JNC-7 para diagnóstico de hipertensión en edad media.

**PA en mediana edad y demencia.** En el análisis multivariable, la hipertensión sistólica en la mediana edad estuvo asociada con un riesgo elevado de demencia incidental (razón de riesgo [HR, *hazard ratio*] 1,57, IC 95% 1,05-2,35), con un riesgo aumentado por cada 10 mm Hg de incremento en la PAS en la mediana edad (HR 1,17, IC 95% 1,05-1,31) (tabla 2 y figura 2). Las pruebas para interacciones de acuerdo con el uso de medicación antihipertensiva no fueron significativas (tabla e-2). En el análisis de sensibilidad, la asociación entre la PA de la mediana edad y la demencia fue consistente en dirección y magnitud, (tabla e-3).

**PA de mediana edad a edad avanzada y demencia.** La persistencia de la hipertensión sistólica de la mediana edad a la edad avanzada estuvo asociada con un riesgo aumentado de demencia (HR 1,96, IC 95% 1,25-3,09) y EA (HR 1,73, IC 95% 1,02-2,94). Una mayor carga acumulada de PAS de la mediana edad a la edad avanzada también estuvo asociada con un mayor riesgo de demencia (HR 1,27, IC 95% 1,05-1,53 por cada unidad de DE de aumento en el ABC) (tabla 3). En el análisis multivariado, una reducción abrupta en la PAS desde la mediana edad a la edad avanzada (pendiente  $< -0,5$  vs  $\geq -0,5$  mm Hg/a) estuvo asociada con un riesgo aumentado de demencia global (HR 1,63, IC 95% 1,08-2,46), pero no de EA (HR 1,47, IC 95% 0,91-2,37). Hubo una interacción significativa entre la hipertensión (presencia/ausencia) en la mediana edad y una reducción abrupta de la PAS de la mediana edad a la edad avanzada en su asociación con la demencia incidental ( $p = 0,023$ ), con un riesgo significativamente aumentado de demencia (HR 2,40, IC 95% 1,39-4,15) y EA (HR 2,12, IC 95% 1,12-4,00), notado en individuos de mediana edad sin PA elevada (tabla 3 y figura e-1). La mayoría de los individuos de mediana edad (61%) con PA baja a normal no recibían medicaciones antihipertensivas en ninguno de los 5 exámenes índice.

**Tabla 2** PA desde la mediana edad a la edad avanzada y demencia

|                                                       | Demencia, HR (IC 95%) |                  |                  | EA, HR (IC 95%)  |                  |                  |
|-------------------------------------------------------|-----------------------|------------------|------------------|------------------|------------------|------------------|
|                                                       | Modelo 1              | Modelo 2         | Modelo 3         | Modelo 1         | Modelo 2         | Modelo 3         |
| <b>Mediana edad</b>                                   |                       |                  |                  |                  |                  |                  |
| Hipertensión sistólica                                | 1,70 (1,14-2,53)      | 1,57 (1,05-2,35) | --               | 1,52 (0,95-2,42) | 1,35 (0,84-2,17) | --               |
| Hipertensión diastólica                               | 1,08 (0,64-1,81)      | 1,14 (0,67-1,91) | --               | 1,11 (0,61-2,00) | 1,21 (0,66-2,19) | --               |
| PAS (por incremento de 10 mm Hg)                      | 1,19 (1,07-1,21)      | 1,17 (1,05-1,31) | --               | 1,13 (1,00-1,28) | 1,11 (0,97-1,26) | --               |
| PAD (por incremento de 10 mm Hg)                      | 1,27 (1,04-1,56)      | 1,24 (1,01-1,52) | --               | 1,28 (1,02-1,62) | 1,24 (0,98-1,57) | --               |
| <b>Edad avanzada</b>                                  |                       |                  |                  |                  |                  |                  |
| Hipertensión sistólica                                | 1,48 (1,01-2,19)      | 1,42 (0,96-2,10) | 1,22 (0,81-1,84) | 1,43 (0,92-2,23) | 1,31 (0,84-2,07) | 1,20 (0,75-1,93) |
| Hipertensión diastólica                               | 1,53 (0,67-3,49)      | 1,61 (0,70-3,68) | 1,39 (0,60-3,23) | 2,06 (0,90-4,74) | 2,27 (0,98-5,26) | 1,99 (0,84-4,69) |
| Menor PAS                                             | 1,47 (0,36-5,97)      | 1,43 (0,35-5,83) | --               | 1,92 (0,47-7,85) | 1,87 (0,45-7,73) | --               |
| Menor PAD                                             | 0,97 (0,66-1,44)      | 0,97 (0,65-1,43) | --               | 0,97 (0,62-1,52) | 0,98 (0,62-1,54) | --               |
| <b>Trayectoria de mediana edad a edad avanzada</b>    |                       |                  |                  |                  |                  |                  |
| Hipertensión sistólica persistente                    | 2,15 (1,37-3,35)      | 1,96 (1,25-3,09) | --               | 2,02 (1,20-3,39) | 1,73 (1,02-2,94) | --               |
| Hipertensión diastólica persistente                   | 2,34 (0,86-6,39)      | 2,11 (0,77-5,79) | --               | 3,21 (1,17-8,82) | 2,94 (1,06-8,18) | --               |
| Reducción abrupta en la PAS                           | 1,62 (1,08-2,44)      | 1,63 (1,08-2,46) | 1,32 (0,84-2,10) | 1,47 (0,91-2,37) | 1,47 (0,91-2,37) | 1,32 (0,78-2,24) |
| Reducción abrupta en la PAD                           | 1,48 (0,99-2,21)      | 1,44 (0,97-2,16) | 1,30 (0,85-1,99) | 1,55 (0,97-2,46) | 1,48 (0,93-2,35) | 1,34 (0,82-2,18) |
| <b>Carga desde la mediana edad a la edad avanzada</b> |                       |                  |                  |                  |                  |                  |
| Carga de PAS (unidades de DE)                         | 1,29 (1,07-1,54)      | 1,27 (1,05-1,53) | --               | 1,14 (0,92-1,42) | 1,10 (0,88-1,38) | --               |

Abreviaturas: EA = enfermedad de Alzheimer; HR = razón de riesgo; IC = intervalo de confianza; PA = presión arterial; PAD = presión arterial diastólica; PAS = presión arterial sistólica. La hipertensión sistólica fue definida como una PAS  $\geq$  140 mm Hg y la hipertensión diastólica como una PAD  $\geq$  90 mm Hg, en línea con los 7 criterios del *Joint National Committee on Prevention, Detection, Evaluation and Treatment of High Blood Pressure*. Un punto de corte de pendiente  $<$ -0,5 indica una reducción abrupta en la presión arterial desde la mediana edad a la edad avanzada. El examen 3 representó la mediana edad (edad media 55 años); el examen 7 representó la edad avanzada (edad media 69 años). El modelo 1 se ajustó a edad y sexo. El modelo 2 se ajustó a edad, sexo, educación, APOE4 y prevalencia de enfermedad cardiovascular (ECV). El modelo 3 se ajustó para edad, sexo, educación, APOE4, prevalencia de ECV y PA de mediana edad (como variable continua)

**PA de mediana edad a edad avanzada y medidas estructurales cerebrales.** En el análisis multivariado, la asociación entre registros significativos de PA de la mediana edad a la edad avanzada (la hipertensión sistólica persistente y la reducción abrupta de la PAS) y la demencia incidental de cualquier causa no estuvo sustancialmente alterada (en dirección o magnitud de la asociación) luego de los ajustes adicionales para las medidas estructurales cerebrales, incluyendo ICE y VHSB. Hubo una pequeña atenuación en la magnitud de la asociación luego de ajustar para VCT y VH, aunque los resultados no alcanzaron a ser significativos (tablas e-4 y e-5). En comparación con participantes sin una reducción abrupta en la PAS desde la mediana edad a la edad avanzada, aquellos con una reducción abrupta en la PAS tuvieron un VCT significativamente menor, pero no VH, en el examen 7, luego de tener en cuenta la edad y el sexo (tabla e-6).

**DISCUSIÓN** Encontramos que la PA elevada en la mediana edad estuvo asociada con un riesgo aumentado de demencia de cualquier causa, con un mayor incremento en el riesgo si la hipertensión persistía hacia la edad avanzada. La hipertensión persistente desde la mediana edad hacia la edad avanzada también estuvo asociada con un riesgo aumentado de EA. En adultos de mediana edad sin hipertensión, una reducción abrupta de la PA

desde la mediana edad a la edad avanzada estuvo asociada con un aumento del doble en el riesgo de desarrollar demencia y EA.

Encontramos un riesgo elevado de demencia en edad avanzada en adultos con hipertensión en la mediana edad. El riesgo de demencia aumentaba con una PAS en aumento, con un 20% de incremento adicional en el riesgo por cada 10 mm Hg de incremento en la PAS en la mediana edad. Más aún, la persistencia de la hipertensión desde la mediana edad a la edad avanzada resultó en un incremento del 25% del riesgo de demencia por encima de lo atribuido a la hipertensión de mediana edad por sí sola, mientras que una mayor exposición acumulada a una PAS elevada a través de la mediana edad hacia la edad avanzada estuvo asociada con un incremento en el riesgo de demencia. Estos datos en conjunto aportan evidencia para apoyar una relación respuesta-dosis entre el grado y la duración de la PA elevada y el riesgo de demencia.

La hipertensión puede predisponer al infarto cerebral y a la demencia a través de múltiples efectos en la vasculatura cerebral, incluyendo la enfermedad de pequeños vasos (ateroesclerosis, lipohialinosis, necrosis fibrinoide y microsangiopatías), aterosclerosis de grandes arterias y disfunción cardíaca relacionada con la hipertensión, predisponiendo a una hipoperfusión cerebral (que hipotéticamente resulta en una eliminación reducida de  $\beta$ -amiloides).

**Figura 2** Incidencia acumulada de demencia de acuerdo con la PA de mediana edad

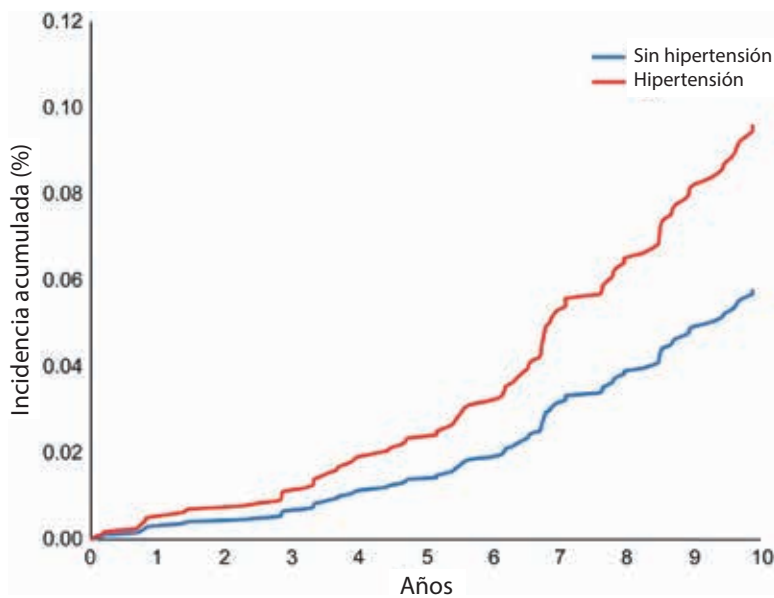

(A) Incidencia acumulada de demencia de acuerdo con la PA de mediana edad. (B) Incidencia acumulada de demencia en individuos sin hipertensión de mediana edad. PA = presión arterial.

Nuestros resultados resaltan los beneficios cognitivos potenciales de una modificación efectiva de la PA en adultos de mediana edad. Ensayos previos que investigaron los efectos del control de la PA para la prevención de la demencia han reportado principalmente resultados negativos, excepto por el Estudio de Protección Contra el Infarto Cerebral Recurrente con Perindopril (PROGRESS, *Perindopril Protection Against Recurrent Stroke Study*) y el Hipertensión Sistólica en Europa (Syst-Eur, *Systolic Hypertension in Europe*) y se han enfocado en su mayoría en la población mayor, han medido el desempeño cognitivo más que la demencia clínicamente confirmada y estuvieron limitados por un poder insuficiente para detectar los efectos del tratamiento o un período de seguimiento corto (rango 0.5-5 años).<sup>20-27</sup>

En individuos sin hipertensión de mediana edad, una reducción abrupta de la PAS desde la mediana edad a la edad avanzada estuvo asociada con un aumento del doble en el riesgo de desarrollar demencia incidental y EA. Estudios previos han reportado mayor atrofia cortical y VHSB en asociación con una reducción abrupta de la PA a lo largo de 20 a 25 años,<sup>28,29</sup> como también se notó una asociación entre una menor PA en la edad avanzada con un desempeño cognitivo alterado, en comparación con PA estables desde la mediana edad a la edad avanzada,<sup>30,31</sup> apoyando nuestra observación. La relación entre la reducción de la PA desde la mediana edad a la edad avanzada y el incremento en el riesgo de demencia es posiblemente multifactorial. Con la edad avanzada, la elasticidad y *compliance* arterial se reducen, llevando a una alteración de la auto-regulación cerebral y de la habilidad de mantener una perfusión cerebral adecuada ante las fluctuaciones de la PA.<sup>32</sup> Esto predispone a la isquemia cerebral por episodios de hipotensión,<sup>33</sup> como también a una reducción en la eliminación de  $\beta$ -amiloide. La causalidad inversa también puede explicar esta asociación. Se ha observado una reducción en la PA en las etapas tempranas de la demencia, y se propuso que esto se debe a efectos neurodegenerativos sobre los núcleos del tronco encefálico y del hipotálamo que controlan la PA,<sup>34,35</sup> como también el desarrollo coexistente de pérdida de peso y enfermedad cardiovascular (que incluye infarto del miocardio y falla cardíaca) en este grupo etario, reduciendo la PA registrada y la perfusión sistémica y cerebral.

En nuestro estudio, los participantes con una reducción abrupta de la PAS desde la mediana edad a la edad avanzada tuvieron menor VCT en comparación con aquellos sin una reducción abrupta, y la magnitud de la asociación entre la reducción abrupta de la PAS y el riesgo de demencia estuvo parcialmente atenuada luego del ajuste para VCT. La regresión hacia la media difícilmente sea la responsable de esta observación,

**Tabla 3** Análisis de subgrupos: Reducción abrupta en la PAS

|                                                                     | Demencia         |                             | EA               |                             |
|---------------------------------------------------------------------|------------------|-----------------------------|------------------|-----------------------------|
|                                                                     | HR (IC 95%)      | Valor p para la interacción | HR (IC 95%)      | Valor p para la interacción |
| PA mediana edad $\geq$ 140/90 mm Hg                                 | 0,89 (0,47-1,67) | 0,02                        | 0,88 (0,41-1,88) | 0,09                        |
| PA mediana edad < 140/90 mm Hg                                      | 2,40 (1,39-4,15) |                             | 2,12 (1,12-4,00) |                             |
| PA mediana edad < 140/90 mm Hg recibiendo terapia antihipertensiva  | 2,46 (0,67-9,00) | 0,5                         | -                | -                           |
| PA mediana edad < 140/90 mm Hg sin recibir terapia antihipertensiva | 2,11 (1,14-3,93) |                             | 1,86 (0,93-3,70) |                             |

Abreviaturas: EA = enfermedad de Alzheimer; HR = razón de riesgo; IC = intervalo de confianza; PA = presión arterial; PAS = presión arterial sistólica.

La hipertensión sistólica fue definida como una PAS  $\geq$  140 mm Hg y la hipertensión diastólica como una PAD  $\geq$  90 mm Hg, en línea con los 7 criterios del *Joint National Committee on Prevention, Detection, Evaluation and Treatment of High Blood Pressure*. Un punto de corte de pendiente  $<$ -0,5 indica una reducción abrupta en la presión arterial desde la mediana edad a la edad avanzada. El examen 3 representó la mediana edad (edad media 55 años); el examen 7 representó la edad avanzada (edad media 69 años).

Los modelos fueron ajustados para edad, sexo, educación, APOE4 y prevalencia de enfermedad cardiovascular prevalente. Las celdas en blanco indican un tamaño de muestra insuficiente para completar el análisis.

dado que observamos la asociación en individuos que fueron de normotensos a hipertensos en la mediana edad, por lo que una mayor reducción en la PA sea probablemente patológica, no debido a una regresión a la media.

Nuestros hallazgos sugieren que un enfoque más agresivo hacia la modificación de la PA en adultos de mediana edad con hipertensión podría bajar el riesgo de demencia tardía y reafirman que bajar la PA en personas con hipertensión hasta los 70 años de edad es más beneficioso que dañino para el riesgo de demencia. Nuestros hallazgos agregan la posibilidad de que una reducción en la PA en adultos mayores con hipertensión (por ej., 130-140/80-90 mm Hg) puede ser dañino para la función cognitiva, a pesar del efecto beneficioso sobre el riesgo de resultados cardiovasculares adversos. Sin embargo, la mayoría de los adultos con prehipertensión no recibían medicación antihipertensiva, por lo que la reducción abrupta podría ser un marcador de riesgo de demencia, posiblemente secundario a cambios neurodegenerativos preclínicos, incluso si también pudiera potenciar la injuria cerebral vascular. Se requiere más investigación para determinar el rango óptimo de PA en adultos mayores asociado con un menor riesgo de demencia tardía.

Las fortalezas de nuestro estudio incluyen la completud de los datos sobre factores de riesgo y resultados, la inclusión de una población libre de demencia clínica en el momento basal, un seguimiento de 18 años con múltiples mediciones de PA permitiendo una evaluación más precisa de la PA a lo largo de la vida y una evaluación cuidadosa de las trayectorias de la PA a través de la mediana edad y la edad avanzada, procedimientos rigurosos para la búsqueda de demencia, y un largo período de seguimiento. Las limitaciones incluyen la cohorte de Framingham predominantemente blanca, que puede afectar la generalización de nuestros hallazgos a pacientes no blancos. Además, no fuimos capaces de realizar ajustes para medidas de RM de injuria cerebral vascular, incluyendo la anisotropía regional fraccional y la difusividad media,<sup>36</sup> que posiblemente habría atenuado más aún la asociación entre la PA y la demencia.

La PA elevada en la mediana edad, la persistencia de la hipertensión hacia la edad avanzada y, entre los no hipertensos, la reducción abrupta de la PA de la mediana edad a la edad avanzada, estuvieron independientemente asociados con un riesgo aumentado de demencia en una cohorte de la comunidad. Nuestros datos resaltan los beneficios cognitivos sostenidos potenciales de una PA baja en la mediana edad, aportando la seguridad de que bajar la PA en adultos mayores hipertensos disminuye el riesgo de demencia, pero aumenta la posibilidad de que al bajar la PA

en adultos mayores con prehipertensión podría afectarse la función cognitiva a pesar del efecto beneficioso sobre el riesgo de eventos cardiovasculares. Se requiere más investigación para determinar el rango de PA óptima en adultos mayores asociado con el menor riesgo de demencia tardía.

## CONTRIBUCIONES DE LOS AUTORES

Dres. McGrath y Seshadri tuvieron acceso total a los datos del estudio y tuvieron la responsabilidad final de la decisión de mandarlo para su publicación. Concepto y diseño del estudio: McGrath, Seshadri, Beiser, Vasan. Adquisición, análisis o interpretación de datos: todos los autores. Borrador del manuscrito: McGrath. Revisión crítica del manuscrito para contenido intelectual importante: todos los autores. Análisis estadístico: Beiser, Plourde. Obtención de fondos: Seshadri. Apoyo administrativo, técnico o material: Beiser, Plourde. Supervisión del estudio: Seshadri.

## FONDOS PARA EL ESTUDIO

El *Framingham Heart Study* es apoyado por el National Heart, Lung, and Blood Institute (contratos N01-HC-25195 y HHSN268201500001I) y por becas del National Institute on Aging (R01 AG054076, R01 AG049607, R01 AG033193, U01 AG049505 y U01 AG052409) y el National Institute of Neurological Disorders and Stroke (NS017950 y UH2 NS100605). Ninguna de las entidades que aportaron fondos tuvo un rol en el diseño y conducción del estudio; la recolección, análisis e interpretación de datos; la preparación, revisión o aprobación del manuscrito; o decisión de publicar el manuscrito.

## DECLARACIÓN DE INTERESES

Los autores no tienen nada para declarar relevante al manuscrito. Ir a [Neurology.org](http://Neurology.org) para declaraciones completas.

Recibido el 27 de abril de 2017. Aceptado en su formato final el 18 de septiembre de 2017.

## BIBLIOGRAFÍA

1. Prince M, Bryce R, Albanese E, Wimo A, Ribeiro W, Ferri CP. The global prevalence of dementia: a systematic review and meta-analysis. *Alzheimers Dement* 2013;9:63–75.e2.
2. Kennelly SP, Lawlor B, Kenny R. Blood pressure and the risk for dementia: a double edged sword. *Ageing Res Rev* 2009;8:61–70.
3. Gorelick PB, Scuteri A, Black SE, et al. Vascular contributions to cognitive impairment and dementia: a statement for healthcare professionals from the American Heart Association/American Stroke Association. *Stroke* 2011;42:2672–2713.
4. Whitmer RA, Sidney S, Selby J, Johnston SC, Yaffe K. Midlife cardiovascular risk factors and risk of dementia in late life. *Neurology* 2005;64:277–281.
5. Launer LJ, Ross GW, Petrovitch H, et al. Midlife blood pressure and dementia: the Honolulu-Asia Aging Study. *Neurobiol Aging* 2000;21:49–55.
6. Kivipelto M, Helkala EL, Laakso MR, et al. Apolipoprotein E epsilon4 allele, elevated midlife total cholesterol level, and high midlife systolic blood pressure are independent risk factors for late-life Alzheimer disease. *Ann Intern Med* 2002;137:149–155.

7. Morris MC, Scherr PA, Hebert LE, Glynn RJ, Bennett DA, Evans DA. Association of incident Alzheimer disease and blood pressure measured from 13 years before to 2 years after diagnosis in a large community study. *Arch Neurol* 2001;58:1640–1646.
8. Qiu C, von Strauss E, Fastbom J, Winblad B, Fratiglioni L. Low blood pressure and risk of dementia in the Kungsholmen project: a 6-year follow-up study. *Arch Neurol* 2003;60:223–228.
9. Skoog I, Lernfelt B, Landahl S, et al. 15-Year longitudinal study of blood pressure and dementia. *Lancet* 1996;347:1141–1145.
10. Tyas SL, Manfreda J, Strain LA, Montgomery PR. Risk factors for Alzheimer's disease: a population-based, longitudinal study in Manitoba, Canada. *Int J Epidemiol* 2001;30:590–597.
11. Ruitenberg A, Skoog I, Ott A, et al. Blood pressure and risk of dementia: results from the Rotterdam Study and the Gothenburg H-70 Study. *Dement Geriatr Cogn Disord* 2001;12:33–39.
12. Verghese J, Lipton RB, Hall CB, Kuslansky G, Katz MJ. Low blood pressure and the risk of dementia in very old individuals. *Neurology* 2003;61:1667–1672.
13. Stewart R, Xue QL, Masaki K, et al. Change in blood pressure and incident dementia: a 32-year prospective study. *Hypertension* 2009;54:233–240.
14. Qiu C, von Strauss E, Winblad B, Fratiglioni L. Decline in blood pressure over time and risk of dementia: a longitudinal study from the Kungsholmen project. *Stroke* 2004;35:1810–1815.
15. Feinleib M, Kannel WB, Garrison RJ, McNamara PM, Castelli WP. The Framingham Offspring Study: design and preliminary data. *Prev Med* 1975;4:518–525.
16. Seshadri S, Wolf P, Beiser A, et al. Lifetime risk of dementia and Alzheimer's disease: the impact of mortality on risk estimates in the Framingham study. *Neurology* 1997;49:1498–1504.
17. American Psychiatric Association. *Diagnostic and Statistical Manual of Mental Disorders: DSM-IV*. Washington: American Psychiatric Association; 1994.
18. McKhann G, Drachman D, Folstein M, Katzman R, Price D, Stadlan EM. Clinical diagnosis of Alzheimer's disease: report of the NINCDS-ADRDA Work Group under the auspices of Department of Health and Human Services Task Force on Alzheimer's Disease. *Neurology* 1984;34:939–944.
19. Chobanian AV, Bakris GL, Black HR, et al. The Seventh Report of the Joint National Committee on Prevention, Detection, Evaluation, and Treatment of High Blood Pressure: the JNC 7 report. *JAMA* 2003;289:2560–2571.
20. Forette F, Seux M-L, Staessen JA, et al. Prevention of dementia in randomised double-blind placebo-controlled Systolic Hypertension in Europe (Syst-Eur) trial. *Lancet* 1998;352:1347–1351.
21. Peters R, Beckett N, Forette F, et al. Incident dementia and blood pressure lowering in the Hypertension in the Very Elderly Trial Cognitive Function Assessment (HYVET-COG): a double-blind, placebo controlled trial. *Lancet Neurol* 2008;7:683–689.
22. Anderson C, Teo K, Gao P, et al. Renin-angiotensin system blockade and cognitive function in patients at high risk of cardiovascular disease: analysis of data from the ONTARGET and TRANSCEND studies. *Lancet Neurol* 2011;10:43–53.
23. Diener H-C, Sacco RL, Yusuf S, et al. Effects of aspirin plus extended-release dipyridamole versus clopidogrel and telmisartan on disability and cognitive function after recurrent stroke in patients with ischaemic stroke in the Prevention Regimen for Effectively Avoiding Second Strokes (PROFESS) trial: a double-blind, active and placebo-controlled study. *Lancet Neurol* 2008;7:875–884.
24. Pearce LA, McClure LA, Anderson DC, et al. Effects of long-term blood pressure lowering and dual antiplatelet treatment on cognitive function in patients with recent lacunar stroke: a secondary analysis from the SPS3 randomised trial. *Lancet Neurol* 2014;13:1177–1185.
25. Applegate WB, Pressel S, Wittes J, et al. Impact of the treatment of isolated systolic hypertension on behavioral variables: results from the Systolic Hypertension in the Elderly Program. *Arch Intern Med* 1994;154:2154–2160.
26. Hornslien GA, Sandset CE, Bath MP, Wyller BT, Berge BE. Effects of candesartan in acute stroke on cognitive function and quality of life: results from the Scandinavian Candesartan Acute Stroke Trial. *Stroke* 2013;44:2022–2024.
27. Moll van Charante EP, Richard E, Eurelings LS, et al. Effectiveness of a 6-year multidomain vascular care intervention to prevent dementia (preDIVA): a cluster-randomised controlled trial. *Lancet* 2016;388:797–805.
28. den Heijer T, Skoog I, Oudkerk M, et al. Association between blood pressure levels over time and brain atrophy in the elderly. *Neurobiol Aging* 2003;24:307–313.
29. Swan GE, DeCarli C, Miller BL, Reed T, Wolf PA, Carmelli D. Biobehavioral characteristics of nondemented older adults with subclinical brain atrophy. *Neurology* 2000;54:2108–2114.
30. Muller M, Sigurdsson S, Kjartansson O, et al. Joint effect of mid- and late-life blood pressure on the brain: the AGES-Reykjavik study. *Neurology* 2014;82:2187–2195.
31. Swan GE, Carmelli D, Larue A. Systolic blood pressure tracking over 25 to 30 years and cognitive performance in older adults. *Stroke* 1998;29:2334–2340.
32. Jani B, Rajkumar C. Ageing and vascular ageing. *Postgrad Med J* 2006;82:357–362.
33. de la Torre J. Alzheimer disease as a vascular disorder: nosological evidence. *Stroke* 2002;33:1152–1162.
34. Ishii M, Iadecola C. Metabolic and non-cognitive manifestations of Alzheimer's disease: the hypothalamus as both culprit and target of pathology. *Cell Metab* 2015;22:761–776.
35. Iadecola C, Davisson RL. Hypertension and cerebrovascular dysfunction. *Cell Metab* 2008;7:476–484.
36. Maillard P, Seshadri S, Beiser A, et al. Effects of systolic blood pressure on white-matter integrity in young adults in the Framingham Heart Study: a cross-sectional study. *Lancet Neurol* 2012;11:1039–1047.
